# Supplementary material for: Chemical Composition of Combretum erythrophyllum Leaf and Stem Bark Extracts
Source: MDPI journal article supplement (doi:10.3390/horticulturae8080755), 2022-08-20
Supplement: s1 [file s1]

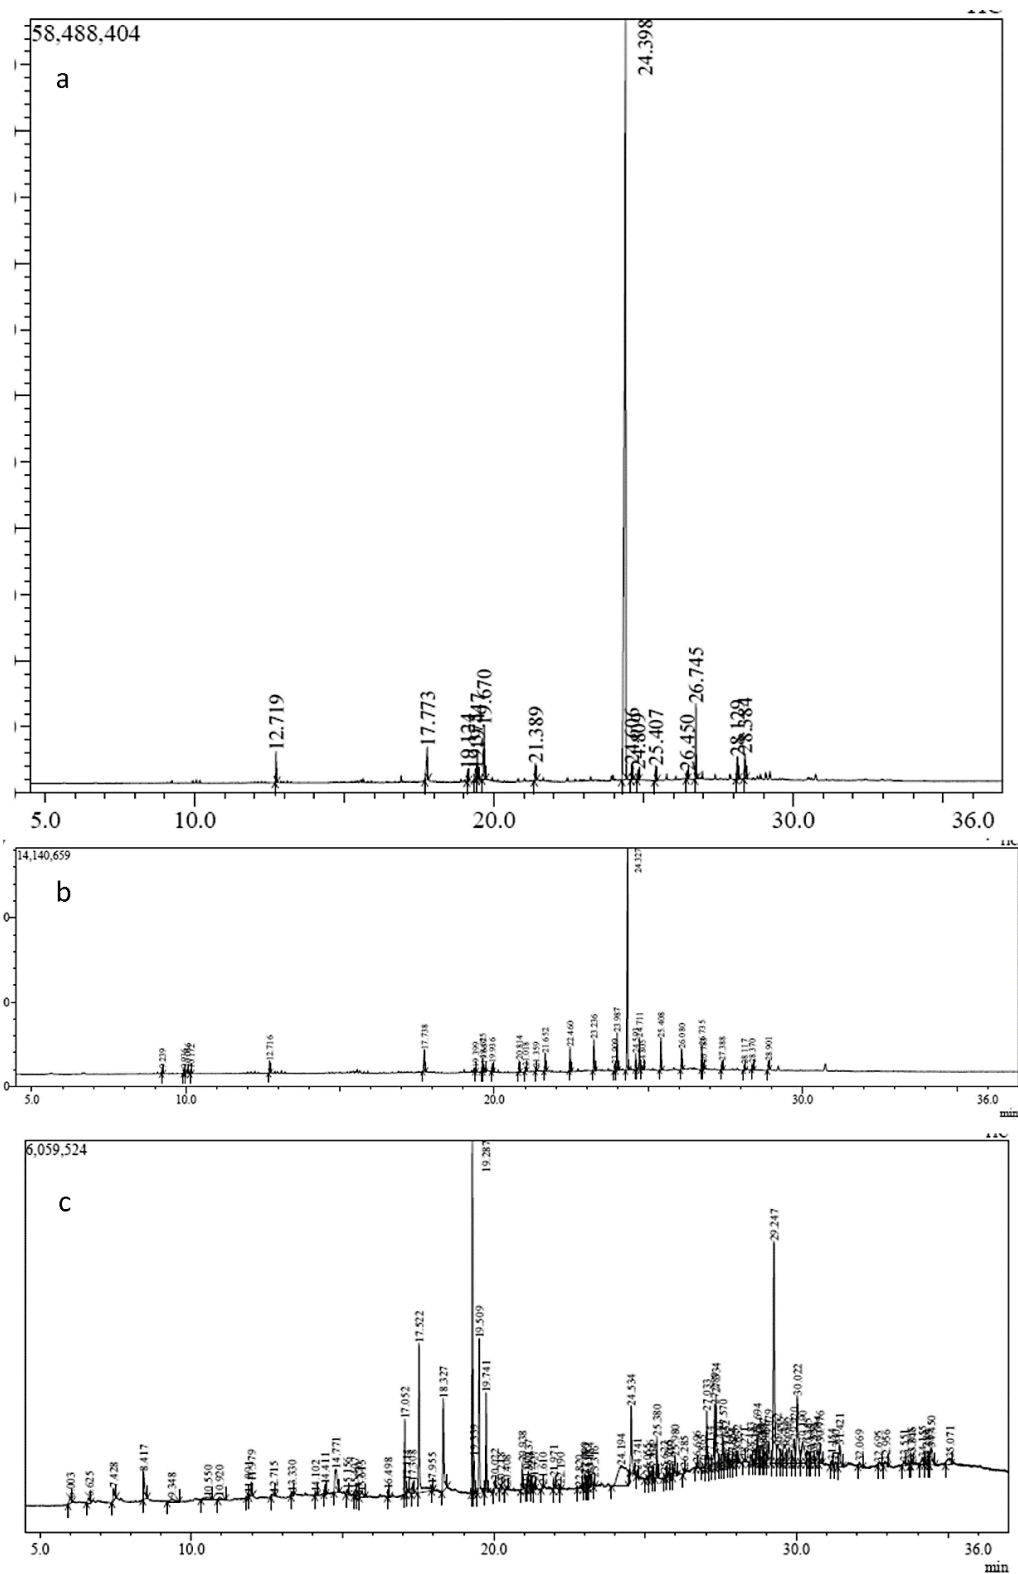

**Figure S1.** Total ion chromatograph of the (a) hexanolic, (b) chloroform and (c) methanolic leaf extracts of *Combretum erythrophyllum*.

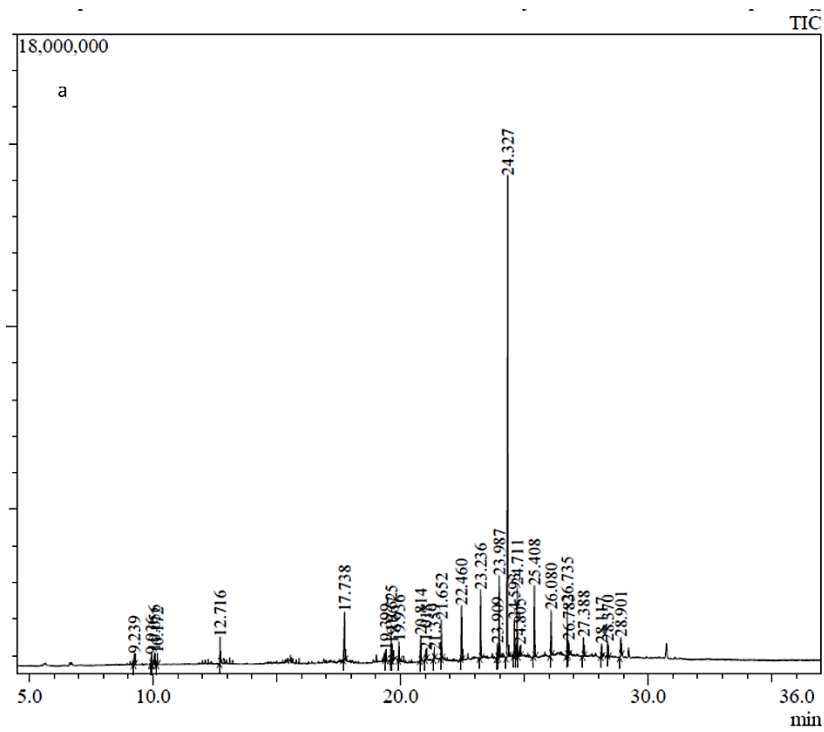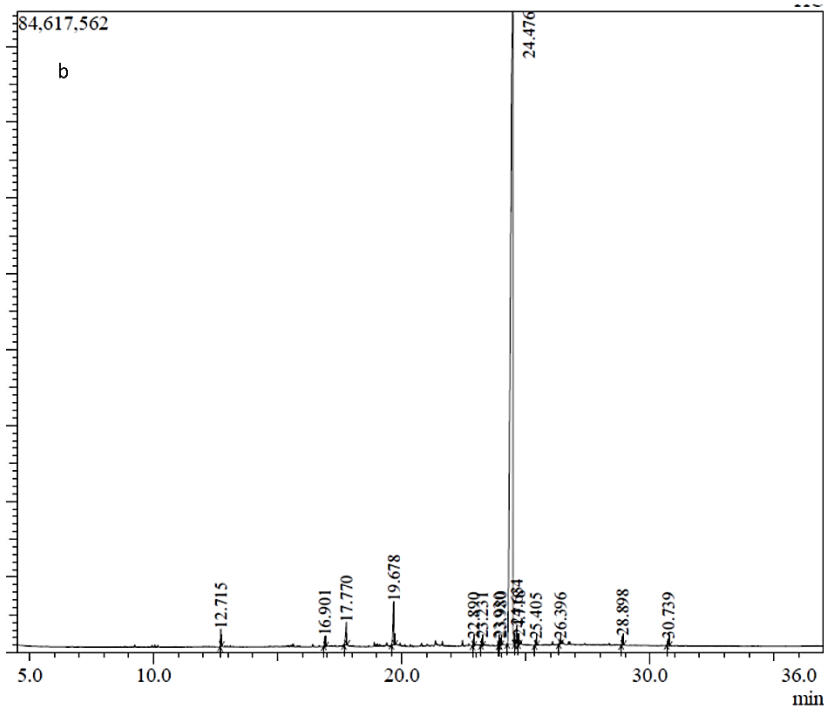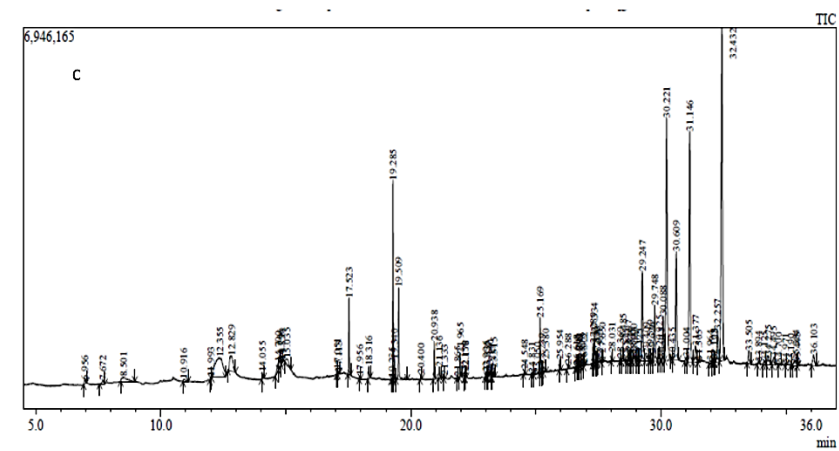

**Figure S2.** Total ion chromatograph of the (a) hexanolic, (b) chloroform and (c) methanolic stem bark extracts of *Combretum erythrophyllum*.
